# Supplementary material for: Composition and mixing state of atmospheric aerosols determined by electron microscopy: method development and application to aged Saharan dust deposition in the Caribbean boundary layer
Source: Copernicus journal article supplement (doi:10.5194/acp-18-13429-2018), 2018-09-21

**Detectable mixture: CV-ground**

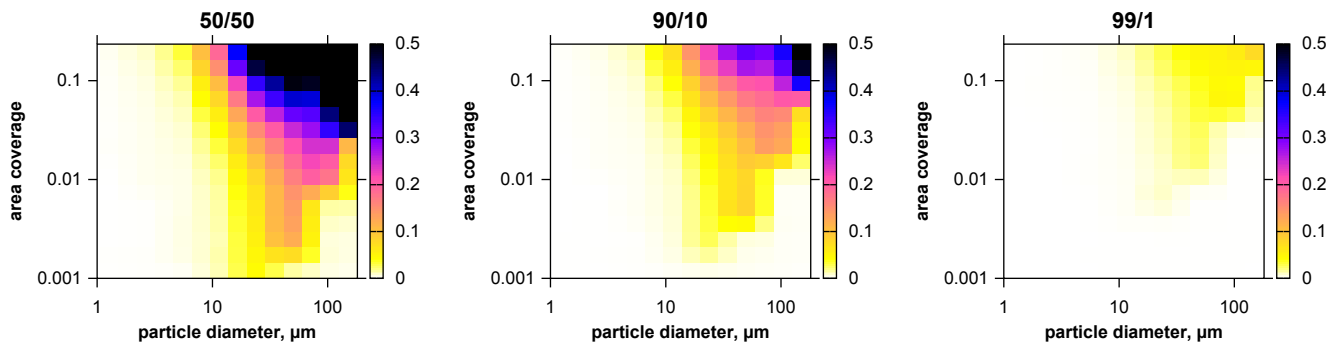

**Detectable mixture: CV-air**

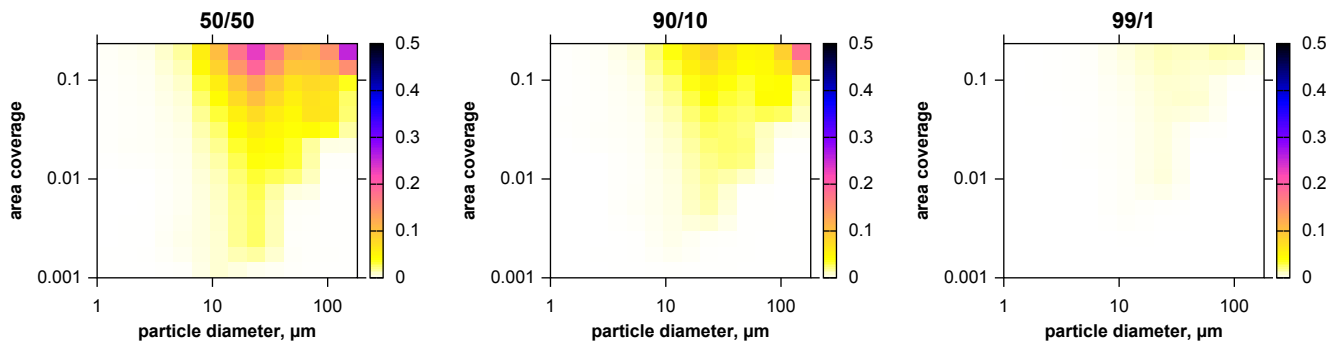

**Strong mixture: CV-ground**

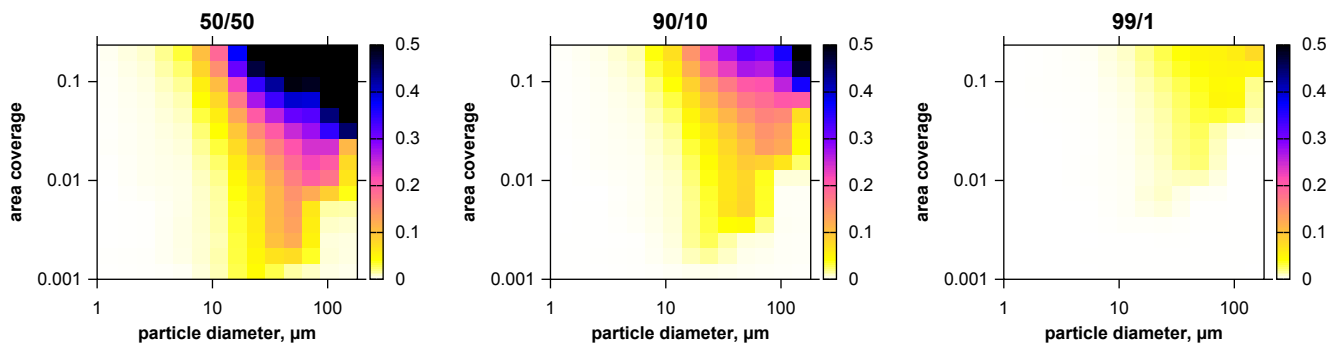

**Strong mixture: CV-air**

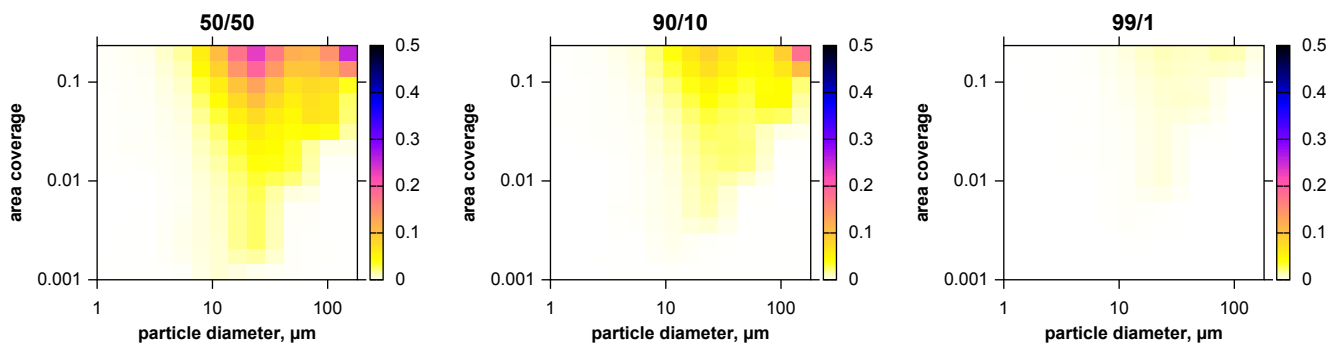

Supplement: Supplementary file 3 [file acp-18-13429-2018-supplement.zip]
