# Supplementary material for: Composition and mixing state of atmospheric aerosols determined by electron microscopy: method development and application to aged Saharan dust deposition in the Caribbean boundary layer
Source: Copernicus journal article supplement (doi:10.5194/acp-18-13429-2018), 2018-09-21
Supplement: Supplementary file 8 [file acp-18-13429-2018-supplement.zip]

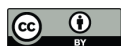

## *Supplement of*

# **Composition and mixing state of atmospheric aerosols determined by electron microscopy: method development and application to aged Saharan dust deposition in the Caribbean boundary layer**

**Konrad Kandler et al.**

*Correspondence to:* Konrad Kandler ([kandler@geo.tu-darmstadt.de](mailto:kandler@geo.tu-darmstadt.de))

- [acp-18-13429-2018-supplement-title-page.pdf](#)
- [Fig. S 1.pdf](#)
- [Fig. S 10.pdf](#)
- [Fig. S 11.pdf](#)
- [Fig. S 2.pdf](#)
- [Fig. S 3.pdf](#)
- [Fig. S 4.pdf](#)
- [Fig. S 5.pdf](#)
- [Fig. S 6.pdf](#)
- [Fig. S 7.pdf](#)
- [Fig. S 8.pdf](#)
- [Fig. S 9.pdf](#)
- [Supplement.pdf](#)
- [data\\_table.txt](#)
- [data\\_table\\_description.pdf](#)
- [data\\_table\\_description.txt](#)
- [sampling\\_times.txt](#)

The copyright of individual parts of the supplement might differ from the CC BY 4.0 License.
