# Supplementary material for: Composition and mixing state of atmospheric aerosols determined by electron microscopy: method development and application to aged Saharan dust deposition in the Caribbean boundary layer
Source: Copernicus journal article supplement (doi:10.5194/acp-18-13429-2018), 2018-09-21
Supplement: Supplementary file 11 [file acp-18-13429-2018-supplement.zip]

This table explains the columns of the main table with particle data (tab-divided), "data\_table.txt". Each line in the main table refers to one particle measurement. That means that for example deposition rates given in the table contain the amount of mass deposited by the according individual particle.

The sample name and number are given in the first column. Refer to the "sampling\_times.txt" and "supplement.pdf" file (Table S 1) for additional information.

Note that most of the quantifications regarding rare elements are probably due to noise. Exceptions might be Ba, Sr, Zr, Ce, Y, Nd, La.

For samples with number of 30 and less, the following elements could not be measured: B, F, Ni, Cu, Zn, Br, Sr, Zr, Mo, Ag, Sn, Sb, Ba, Y, In, Ce, Nd, Tb, Re, Os, Pt, Tl, Pb, Ge, La, Rb, Pd, Cd, Eu, Yb, Ir, U, Rh, Pr, Hf, Ta, Tc, Bi, Sc, I, Cs, Dy, W, Hg, Ru, Tm, Nb

| <b>column header</b> | <b>description</b>                                                                                                   |
|----------------------|----------------------------------------------------------------------------------------------------------------------|
| sample name          | designation of sample, see separate table for date/time of sampling                                                  |
| AvgDiam              | particle projected-area-equivalent diameter, $10^{-6}$ m                                                             |
| LProj                | particle longest projection, $10^{-6}$ m                                                                             |
| Area                 | particle area, $10^{-12}$ m <sup>2</sup>                                                                             |
| Perim                | particle perimeter, $10^{-6}$ m                                                                                      |
| Aspe                 | particle 2D aspect ratio                                                                                             |
| XPos_abs             | absolute X position of particle centroid on sample, $10^{-6}$ m; for each separate sample, these values are absolute |
| YPos_abs             | absolute Y position of particle centroid on sample, $10^{-6}$ m; for each separate sample, these values are absolute |
| C                    | corrected atomic concentration of C, %                                                                               |
| N                    | corrected atomic concentration of N, %                                                                               |
| O                    | corrected atomic concentration of O, %                                                                               |
| Na                   | corrected atomic concentration of Na, %                                                                              |
| Mg                   | corrected atomic concentration of Mg, %                                                                              |
| Al                   | corrected atomic concentration of Al, %                                                                              |
| Si                   | corrected atomic concentration of Si, %                                                                              |
| P                    | corrected atomic concentration of P, %                                                                               |
| S                    | corrected atomic concentration of S, %                                                                               |
| Cl                   | corrected atomic concentration of Cl, %                                                                              |
| K                    | corrected atomic concentration of K, %                                                                               |
| Ca                   | corrected atomic concentration of Ca, %                                                                              |
| Ti                   | corrected atomic concentration of Ti, %                                                                              |
| V                    | corrected atomic concentration of V, %                                                                               |
| Cr                   | corrected atomic concentration of Cr, %                                                                              |
| Mn                   | corrected atomic concentration of Mn, %                                                                              |
| Fe                   | corrected atomic concentration of Fe, %                                                                              |
| Co                   | corrected atomic concentration of Co, %                                                                              |
| B                    | corrected atomic concentration of B, %                                                                               |
| F                    | corrected atomic concentration of F, %                                                                               |
| Ni                   | corrected atomic concentration of Ni, %                                                                              |
| Cu                   | corrected atomic concentration of Cu, %                                                                              |
| Zn                   | corrected atomic concentration of Zn, %                                                                              |
| Br                   | corrected atomic concentration of Br, %                                                                              |
| Sr                   | corrected atomic concentration of Sr, %                                                                              |
| Zr                   | corrected atomic concentration of Zr, %                                                                              |
| Mo                   | corrected atomic concentration of Mo, %                                                                              |

| <i>column header</i>    | <i>description</i>                          |
|-------------------------|---------------------------------------------|
| Ag                      | corrected atomic concentration of Ag, %     |
| Sn                      | corrected atomic concentration of Sn, %     |
| Sb                      | corrected atomic concentration of Sb, %     |
| Ba                      | corrected atomic concentration of Ba, %     |
| Y                       | corrected atomic concentration of Y, %      |
| In                      | corrected atomic concentration of In, %     |
| Ce                      | corrected atomic concentration of Ce, %     |
| Nd                      | corrected atomic concentration of Nd, %     |
| Tb                      | corrected atomic concentration of Tb, %     |
| Re                      | corrected atomic concentration of Re, %     |
| Os                      | corrected atomic concentration of Os, %     |
| Pt                      | corrected atomic concentration of Pt, %     |
| Tl                      | corrected atomic concentration of Tl, %     |
| Pb                      | corrected atomic concentration of Pb, %     |
| Ge                      | corrected atomic concentration of Ge, %     |
| La                      | corrected atomic concentration of La, %     |
| Rb                      | corrected atomic concentration of Rb, %     |
| Pd                      | corrected atomic concentration of Pd, %     |
| Cd                      | corrected atomic concentration of Cd, %     |
| Eu                      | corrected atomic concentration of Eu, %     |
| Yb                      | corrected atomic concentration of Yb, %     |
| Ir                      | corrected atomic concentration of Ir, %     |
| U                       | corrected atomic concentration of U, %      |
| Rh                      | corrected atomic concentration of Rh, %     |
| Pr                      | corrected atomic concentration of Pr, %     |
| Hf                      | corrected atomic concentration of Hf, %     |
| Ta                      | corrected atomic concentration of Ta, %     |
| Tc                      | corrected atomic concentration of Tc, %     |
| Bi                      | corrected atomic concentration of Bi, %     |
| Sc                      | corrected atomic concentration of Sc, %     |
| I                       | corrected atomic concentration of I, %      |
| Cs                      | corrected atomic concentration of Cs, %     |
| Dy                      | corrected atomic concentration of Dy, %     |
| W                       | corrected atomic concentration of W, %      |
| Hg                      | corrected atomic concentration of Hg, %     |
| Ru                      | corrected atomic concentration of Ru, %     |
| Tm                      | corrected atomic concentration of Tm, %     |
| Nb                      | corrected atomic concentration of Nb, %     |
| group name              | particle sub-type as identified by rule set |
| class name              | particle type as identified by rule set     |
| S_V                     | volumetric shape factor                     |
| VOLAVGDIAM              | volume-averaged diameter. $10^{-6}$ m       |
| MASS_DUSTPARTICLE_UPPER | upper estimate of dust mass in particle, kg |
| MASS_DUSTPARTICLE_LOWER | lower estimate of dust mass in particle, kg |
| MASS_FE_UPPER           | upper estimate of Fe mass in particle, kg   |
| MASS_FE_LOWER           | lower estimate of Fe mass in particle, kg   |
| MASS_SI_UPPER           | upper estimate of Si mass in particle, kg   |
| MASS_SI_LOWER           | lower estimate of Si mass in particle, kg   |
| MASS_AL_UPPER           | upper estimate of Al mass in particle, kg   |
| MASS_AL_LOWER           | lower estimate of Al mass in particle, kg   |

| <i>column header</i>                              | <i>description</i>                                                               |
|---------------------------------------------------|----------------------------------------------------------------------------------|
| MASS_P_UPPER                                      | upper estimate of P mass in particle, kg                                         |
| MASS_P_LOWER                                      | lower estimate of P mass in particle, kg                                         |
| MASS_Ti_UPPER                                     | upper estimate of Ti mass in particle, kg                                        |
| MASS_Ti_LOWER                                     | lower estimate of Ti mass in particle, kg                                        |
| D_DUST_AERO_UPPER                                 | upper estimate of aerodynamic diameter of dust (or dust fraction in particle), m |
| D_DUST_AERO_LOWER                                 | lower estimate of aerodynamic diameter of dust (or dust fraction in particle), m |
| DEPOFLUX_DUST_UPPER                               | upper estimate of dust deposition flux for this sample, mg/m <sup>2</sup>        |
| DEPOFLUX_DUST_LOWER                               | lower estimate of dust deposition flux for this sample, mg/m <sup>2</sup>        |
| DEPOFLUX_Fe_UPPER                                 | upper estimate of Fe deposition flux for this sample, mg/m <sup>2</sup>          |
| DEPOFLUX_Fe_LOWER                                 | lower estimate of Fe deposition flux for this sample, mg/m <sup>2</sup>          |
| DEPOFLUX_Si_UPPER                                 | upper estimate of Si deposition flux for this sample, mg/m <sup>2</sup>          |
| DEPOFLUX_Si_LOWER                                 | lower estimate of Si deposition flux for this sample, mg/m <sup>2</sup>          |
| DEPOFLUX_Al_UPPER                                 | upper estimate of Al deposition flux for this sample, mg/m <sup>2</sup>          |
| DEPOFLUX_Al_LOWER                                 | lower estimate of Al deposition flux for this sample, mg/m <sup>2</sup>          |
| DEPOFLUX_P_UPPER                                  | upper estimate of P deposition flux for this sample, mg/m <sup>2</sup>           |
| DEPOFLUX_P_LOWER                                  | lower estimate of P deposition flux for this sample, mg/m <sup>2</sup>           |
| DEPOFLUX_Ti_UPPER                                 | upper estimate of Ti deposition flux for this sample, mg/m <sup>2</sup>          |
| DEPOFLUX_Ti_LOWER                                 | lower estimate of Ti deposition flux for this sample, mg/m <sup>2</sup>          |
| DEPORATE_DUST_UPPER                               | upper estimate of dust deposition rate for this sample, mg/(m <sup>2</sup> d)    |
| DEPORATE_DUST_LOWER                               | lower estimate of dust deposition rate for this sample, mg/(m <sup>2</sup> d)    |
| DEPORATE_Fe_UPPER                                 | upper estimate of Fe deposition rate for this sample, mg/(m <sup>2</sup> d)      |
| DEPORATE_Fe_LOWER                                 | lower estimate of Fe deposition rate for this sample, mg/(m <sup>2</sup> d)      |
| DEPORATE_Si_UPPER                                 | upper estimate of Si deposition rate for this sample, mg/(m <sup>2</sup> d)      |
| DEPORATE_Si_LOWER                                 | lower estimate of Si deposition rate for this sample, mg/(m <sup>2</sup> d)      |
| DEPORATE_Al_UPPER                                 | upper estimate of Al deposition rate for this sample, mg/(m <sup>2</sup> d)      |
| DEPORATE_Al_LOWER                                 | lower estimate of Al deposition rate for this sample, mg/(m <sup>2</sup> d)      |
| DEPORATE_P_UPPER                                  | upper estimate of P deposition rate for this sample, mg/(m <sup>2</sup> d)       |
| DEPORATE_P_LOWER                                  | lower estimate of P deposition rate for this sample, mg/(m <sup>2</sup> d)       |
| DEPORATE_Ti_UPPER                                 | upper estimate of Ti deposition rate for this sample, mg/(m <sup>2</sup> d)      |
| DEPORATE_Ti_LOWER                                 | lower estimate of Ti deposition rate for this sample, mg/(m <sup>2</sup> d)      |
| RH_ambient (% rel. hum.)                          | average relative humidity for sample, %                                          |
| T_ambient (K)                                     | average temperature for sample, K                                                |
| P_ambient (hPa)                                   | average air pressure for sample, hPa                                             |
| v_wind (m/s)                                      | average wind speed for sample, m/s                                               |
| sampling_duration (minutes)                       | exposure duration, minutes                                                       |
| analysis_area (10 <sup>-12</sup> m <sup>2</sup> ) | area analyzed on sampler, 10 <sup>-12</sup> m <sup>2</sup>                       |
