# Supplementary figures and images for: Composition and mixing state of atmospheric aerosols determined by electron microscopy: method development and application to aged Saharan dust deposition in the Caribbean boundary layer
Source: Copernicus journal article supplement (doi:10.5194/acp-18-13429-2018), 2018-09-21

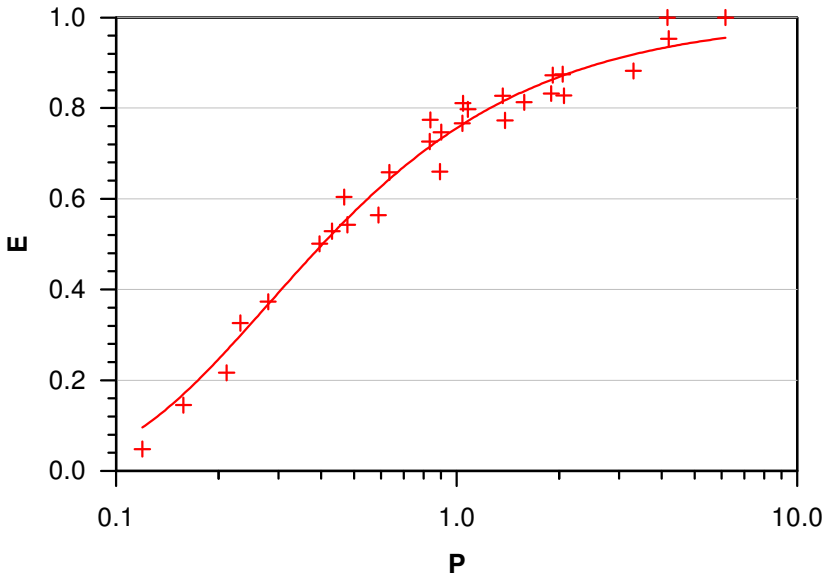

Supplement: Supplementary file 2 [file acp-18-13429-2018-supplement.zip]

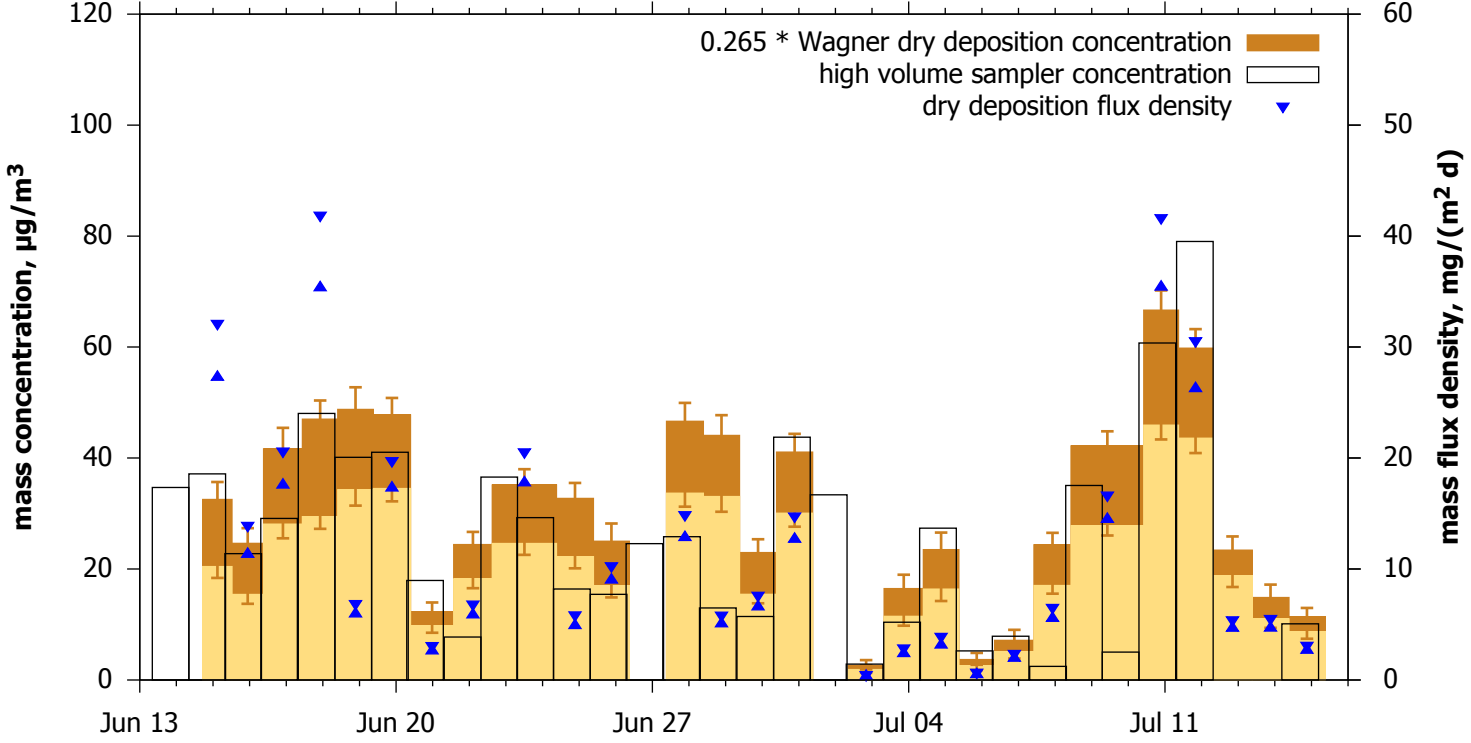

Supplement: Supplementary file 4 [file acp-18-13429-2018-supplement.zip]

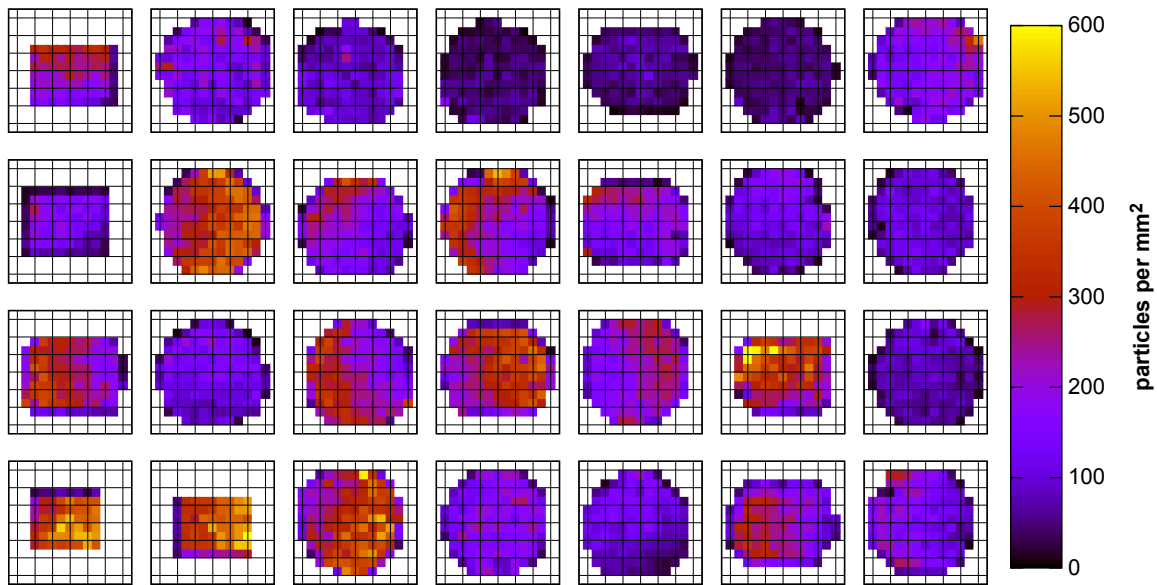

Supplement: Supplementary file 5 [file acp-18-13429-2018-supplement.zip]

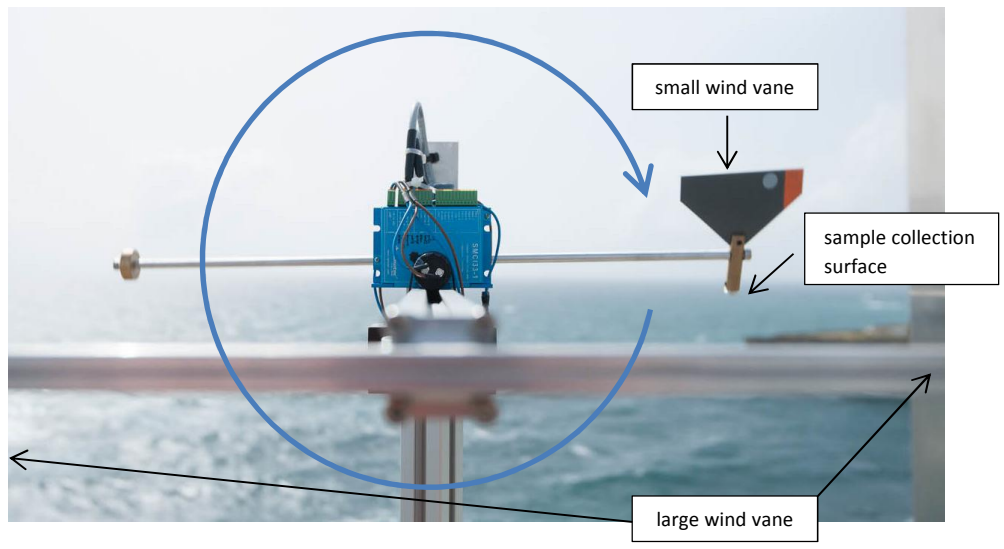

Supplement: Supplementary file 6 [file acp-18-13429-2018-supplement.zip]

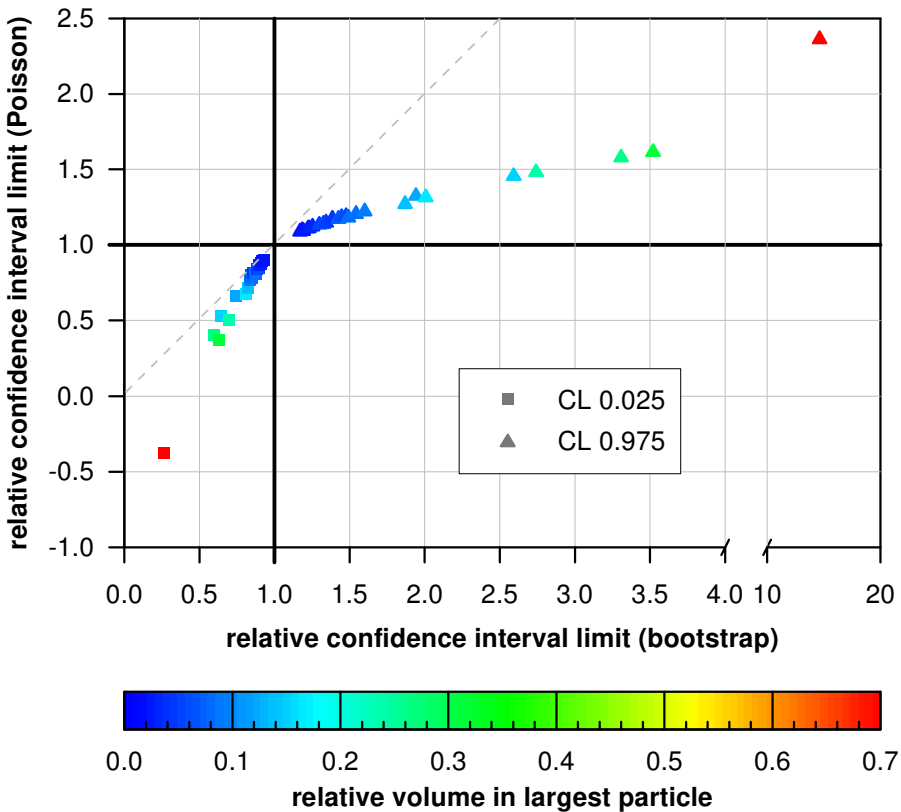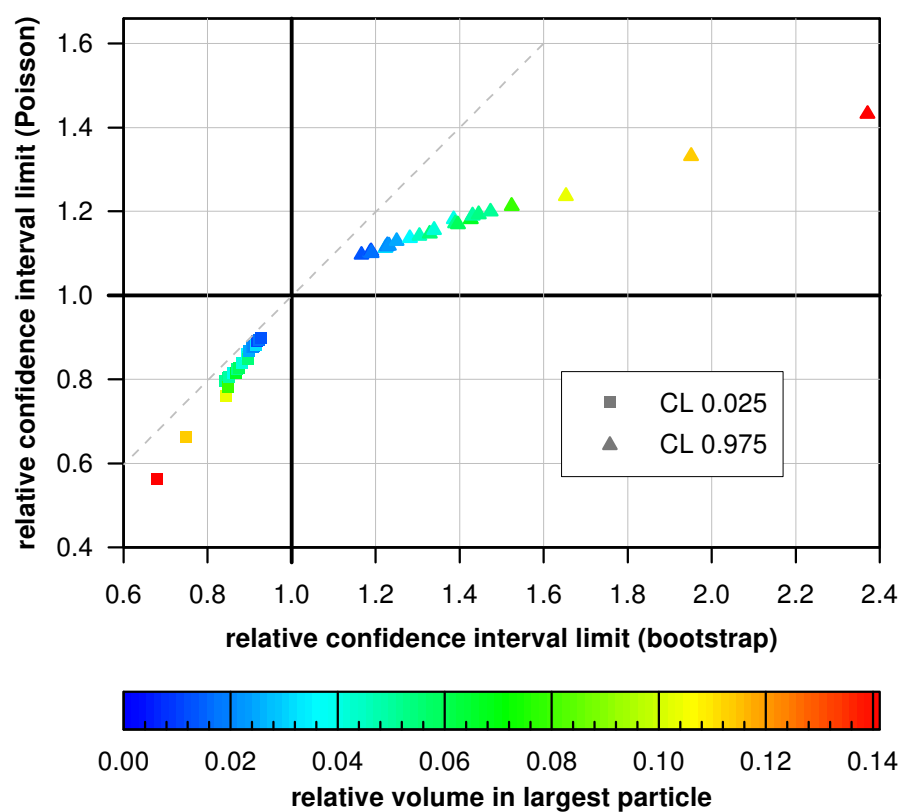

Supplement: Supplementary file 7 [file acp-18-13429-2018-supplement.zip]

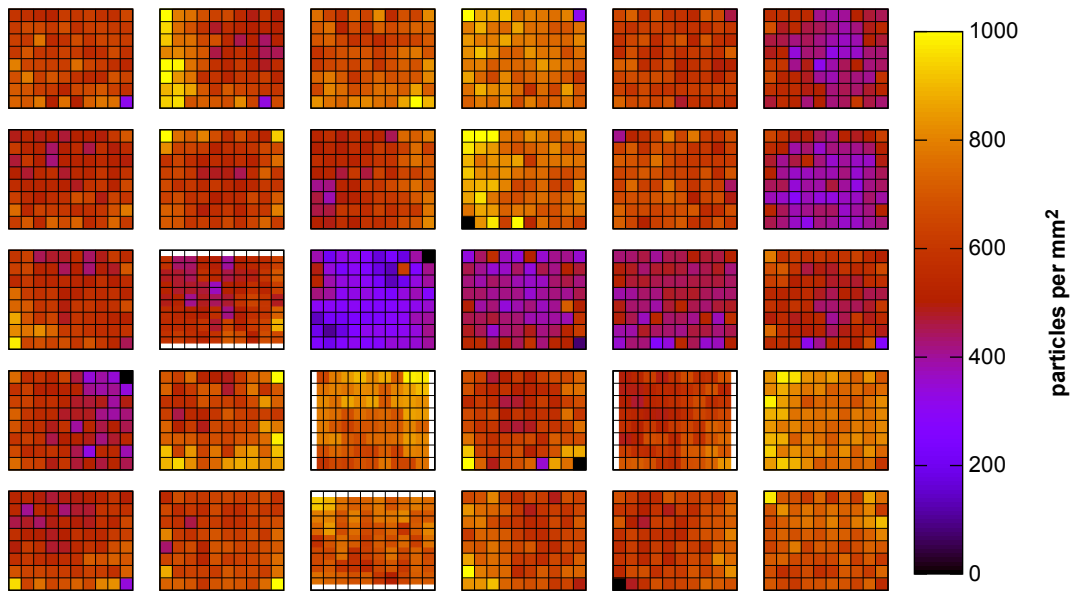

Supplement: Supplementary file 9 [file acp-18-13429-2018-supplement.zip]

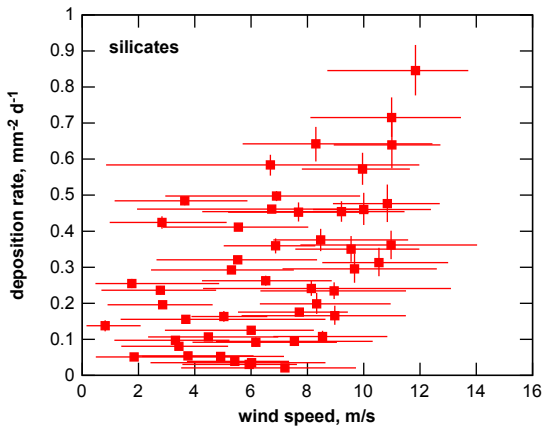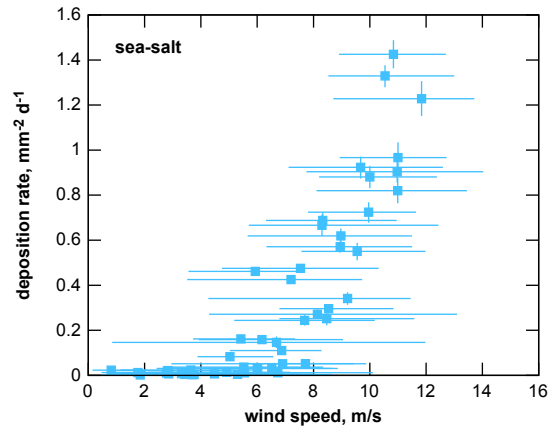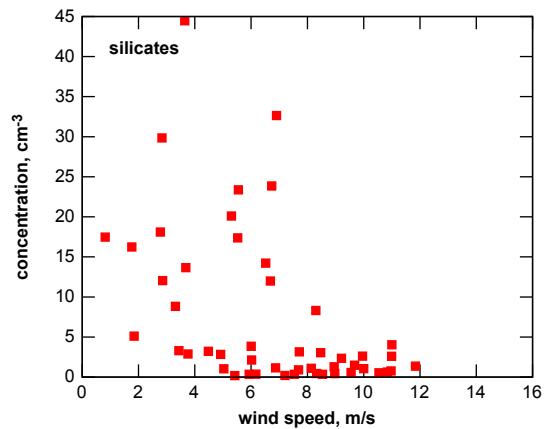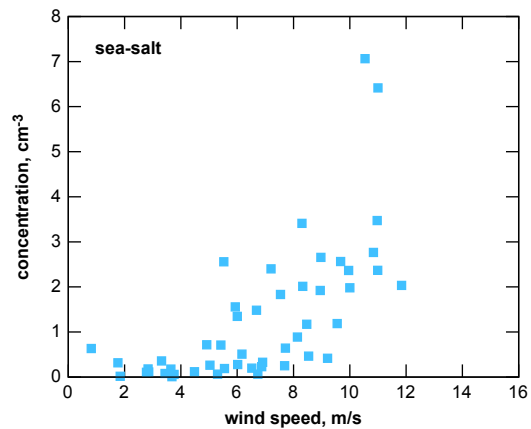

Supplement: Supplementary file 10 [file acp-18-13429-2018-supplement.zip]

2013

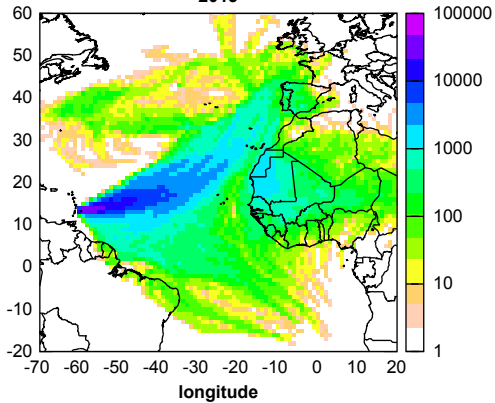

2016

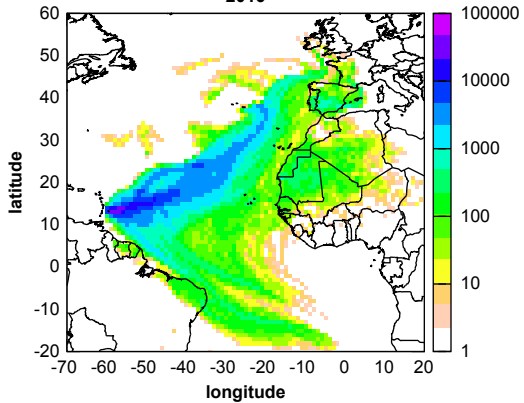

Supplement: Supplementary file 12 [file acp-18-13429-2018-supplement.zip]

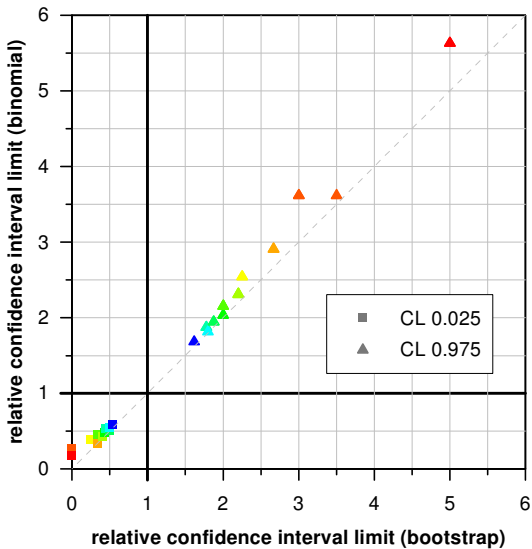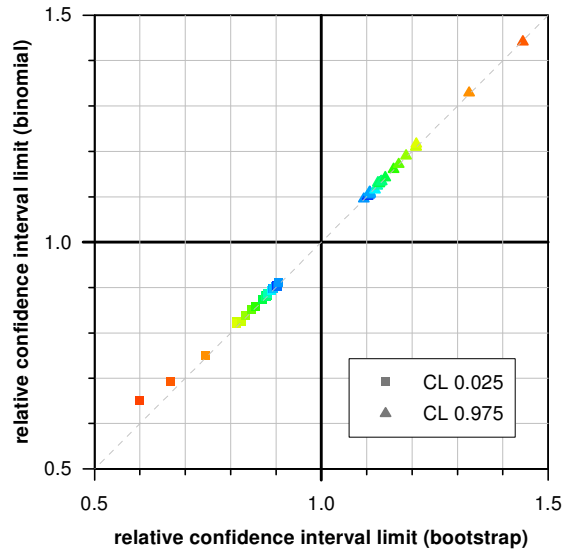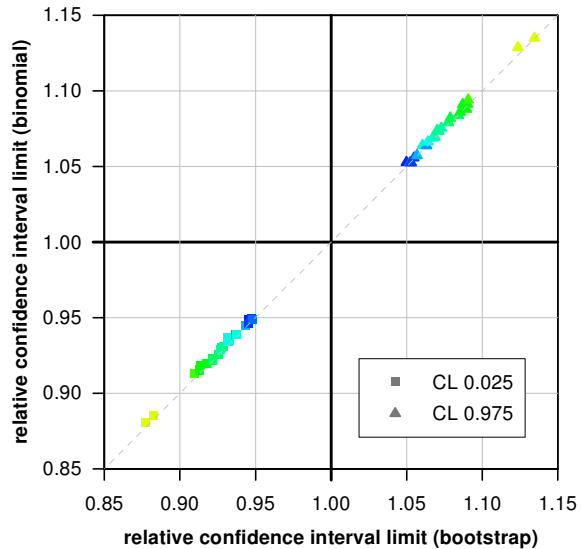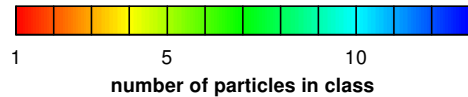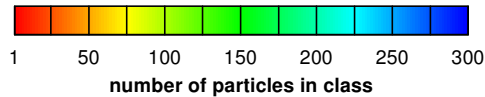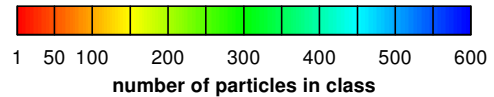

Supplement: Supplementary file 13 [file acp-18-13429-2018-supplement.zip]

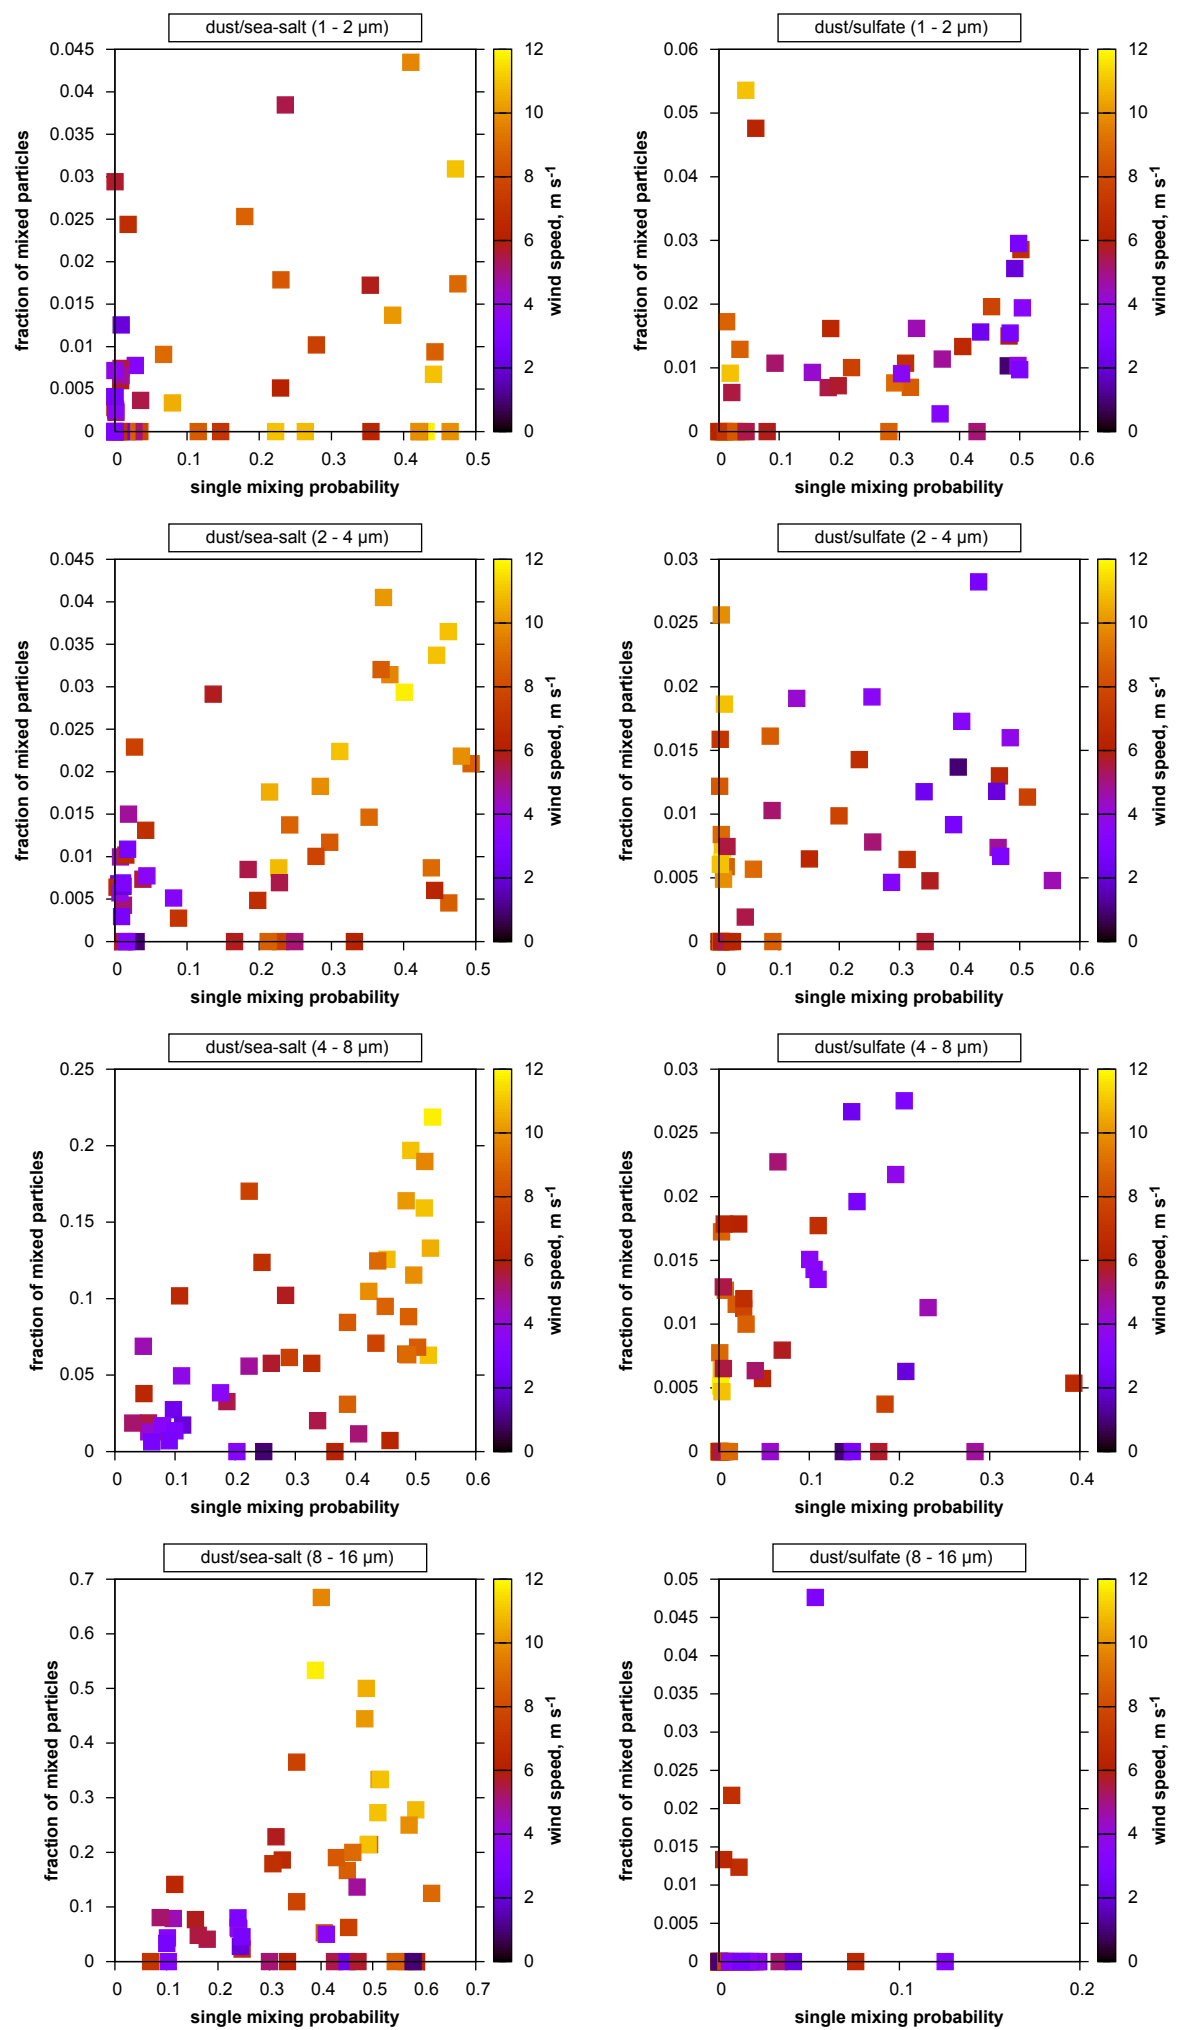

Supplement: Supplementary file 14 [file acp-18-13429-2018-supplement.zip]
